# Supplementary material
Source: publisher figshare collection journal article supplement (https://acs.figshare.com/ndownloader/files/4013659)
Supplement: Supplementary file 1 [file 4013659]

# Supporting Information

## Room Temperature Electrodeposition of Molybdenum Sulfide for Catalytic and Photoluminescence Applications

*Sankaran Murugesan, Arunkumar Akkineni, Brendan P. Chou, Micah S. Glaz<sup>†</sup>, David A. Vanden  
Bout and Keith J. Stevenson\**

Department of Chemistry, The University of Texas at Austin, 1 University Station, Austin, Texas,  
78712, USA

---

\* Corresponding author: Keith J. Stevenson (stevenson@mail.utexas.edu) (T) +1-512- 232-9160;  
(F) +1-512-471-8696

<sup>†</sup> Present address: Department of Chemistry, University of Washington, Seattle, WA 98195.

## Figures

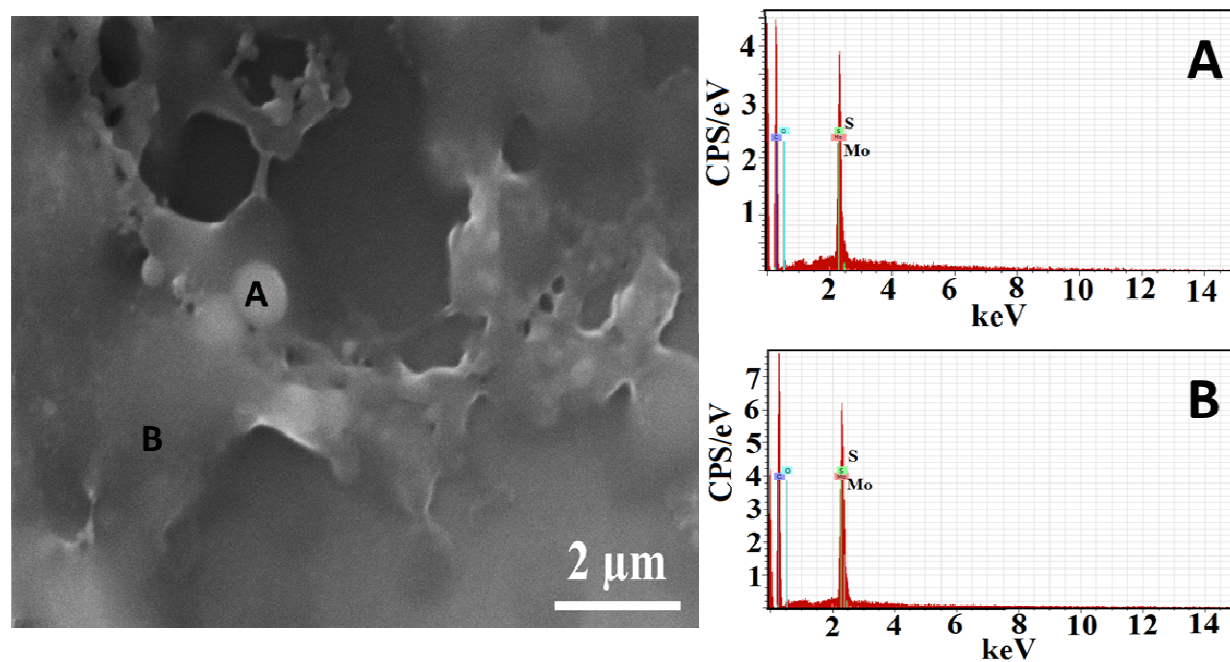

**Figure S1.** SEM-EDS analysis of MoS<sub>2</sub> film deposited on GC by chronoamperometric method at -2.7 V vs. Pt (QRE) for 1800 s at 100 °C of the with equal quantity of sulfur precursor (1, 4 butanedithiol) with molybdenum glycolate in PP<sub>13</sub>TFSI ionic liquid. A and B are the sites in the image were analyzed shows the presence of Mo and S in the elemental analysis shown in A and B.

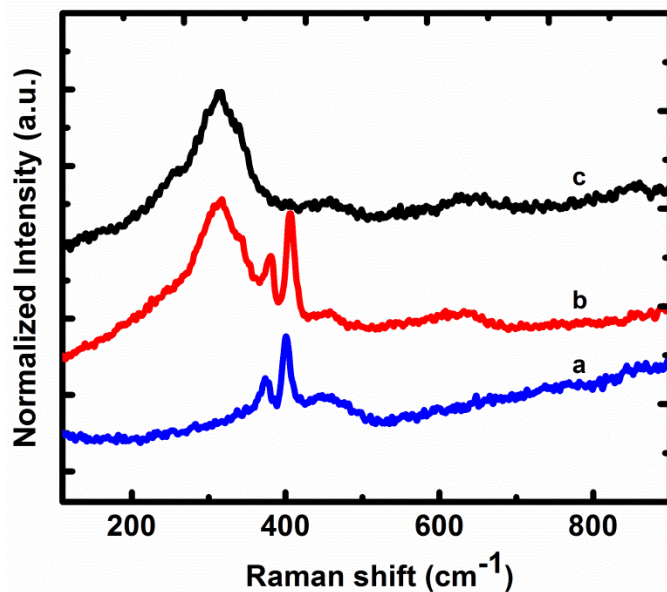

**Figure S2.** MoS<sub>x</sub> films deposited potentiodynamically from 0 to -2.7 V vs. Pt at 100 mV/s scan rate over polished GC substrates with different ratio of Mo and Sulfur precursors, a. 1:1, b. 1:2 and c. 1:3 ratios at 100 °C.

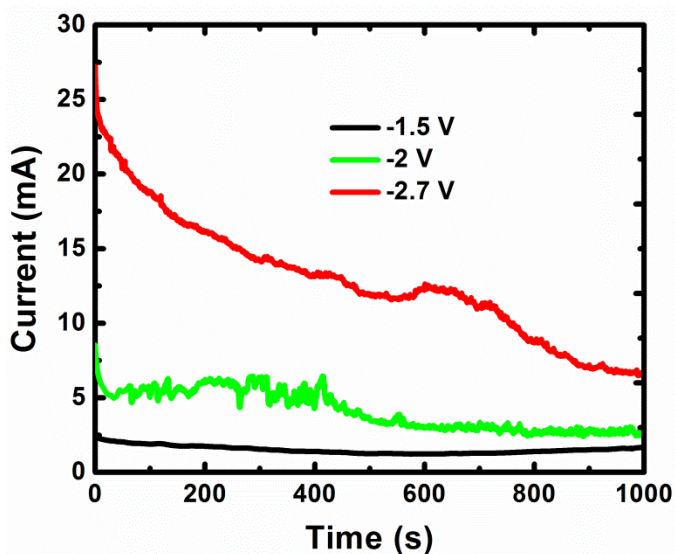

**Figure S3.** Chronoamperometric deposition of MoS<sub>2</sub> film deposition at 100 °C over GC substrates at various potentials, -1.5 V (Black color line), -2 V (Green color line) and -2.7 V (Red color line) vs. Pt (QRE) with 1:1 volume ratio of Mo and S precursors.

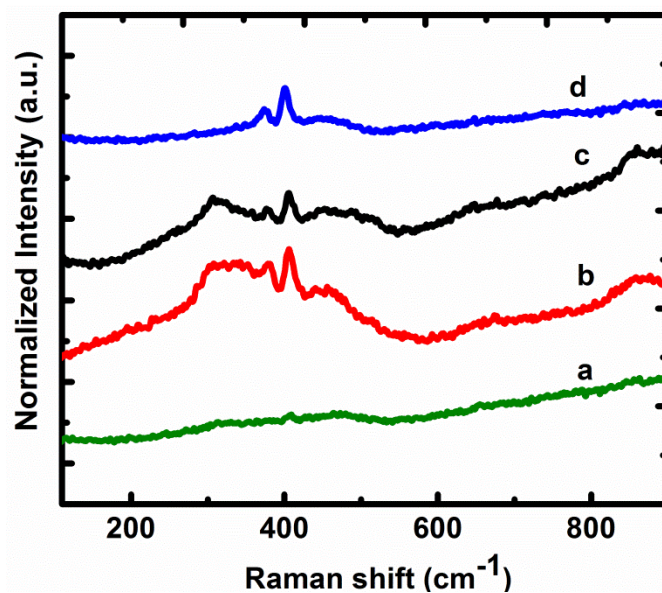

**Figure S4.** MoS<sub>x</sub> films deposited chronoamperometrically at different potential, a. -1V, b. -2V, c. -2.5 and d. -2.7 V vs. Pt (QRE) at 100 °C over polished GC substrates with 1:1 volume ratio of Mo and S precursors.

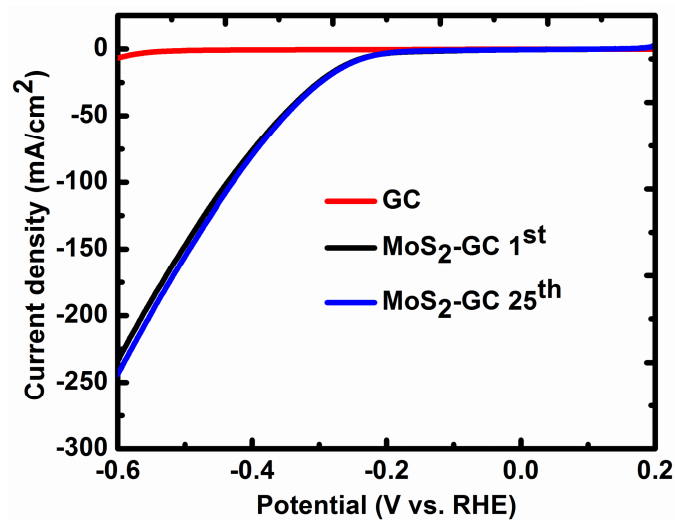

**Figure S5.** Polarization curves of GC (red color line) and MoS<sub>2</sub> over GC electrodes (black line) 1<sup>st</sup> scan and 25<sup>th</sup> scan (blue color) in 0.5 M H<sub>2</sub>SO<sub>4</sub> at the scan rate of 2 mV/s.

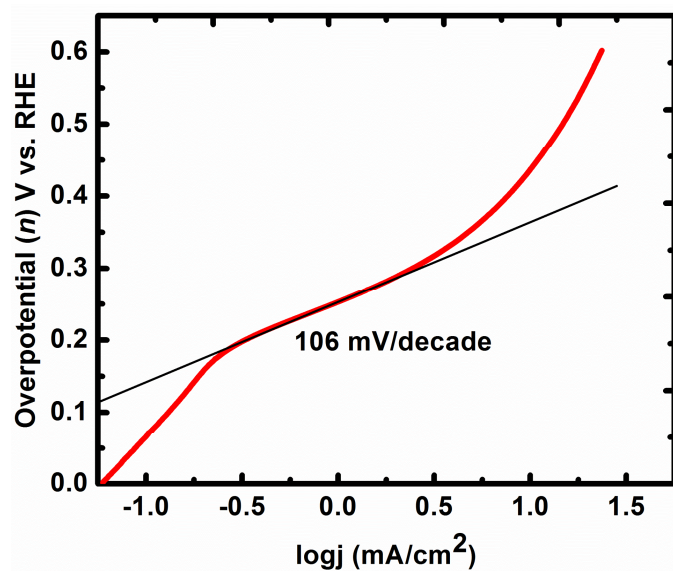

**Figure S6.** Tafel analysis of the polarization curve for MoS<sub>2</sub> over GC electrodes in 0.5 M H<sub>2</sub>SO<sub>4</sub> at the scan rate of 2 mV/s.
